# Supplementary material for: Diagnostic value of procalcitonin, hypersensitive C-reactive protein and neutrophil-to-lymphocyte ratio for bloodstream infections in pediatric tumor patients
Source: publisher site journal article supplement (doi:10.1515/cclm-2022-0801), 2022-11-11
Supplement: Supplementary file 1 [file j_cclm-2022-0801_suppl_001.docx]

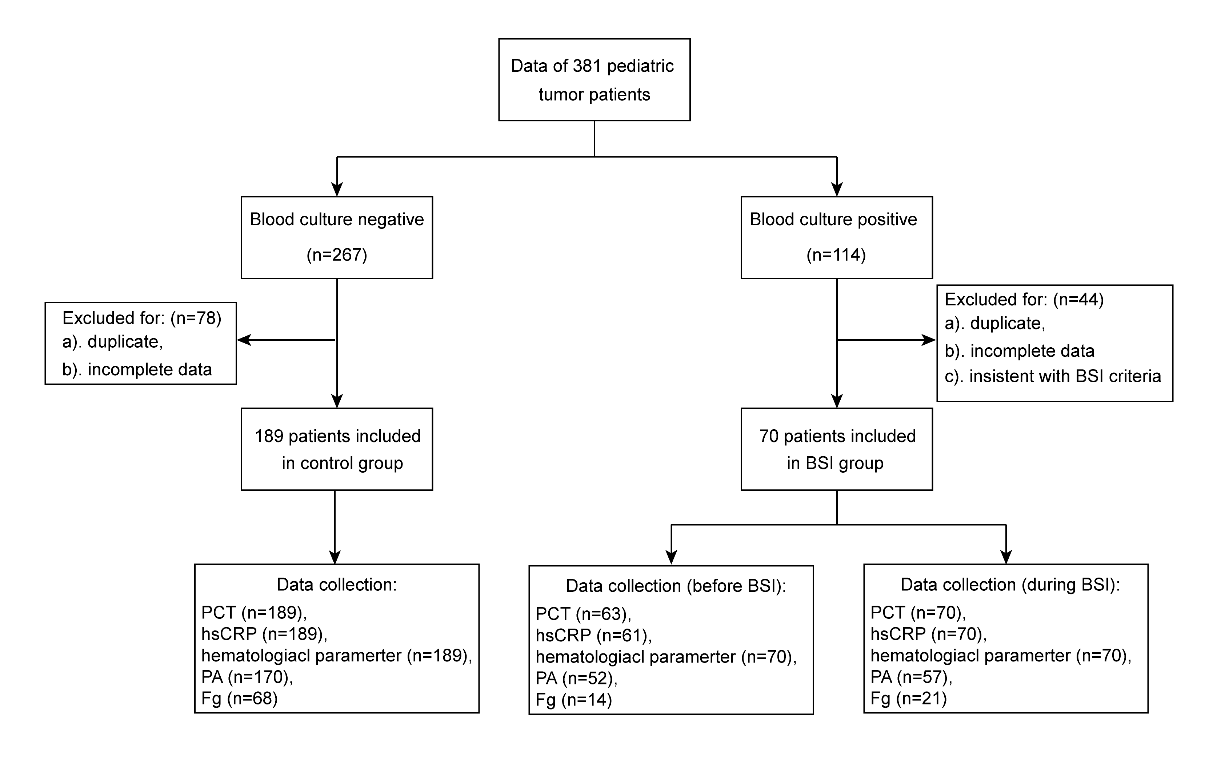


Supplemental material, Figure 1. Flow diagram of case collection.


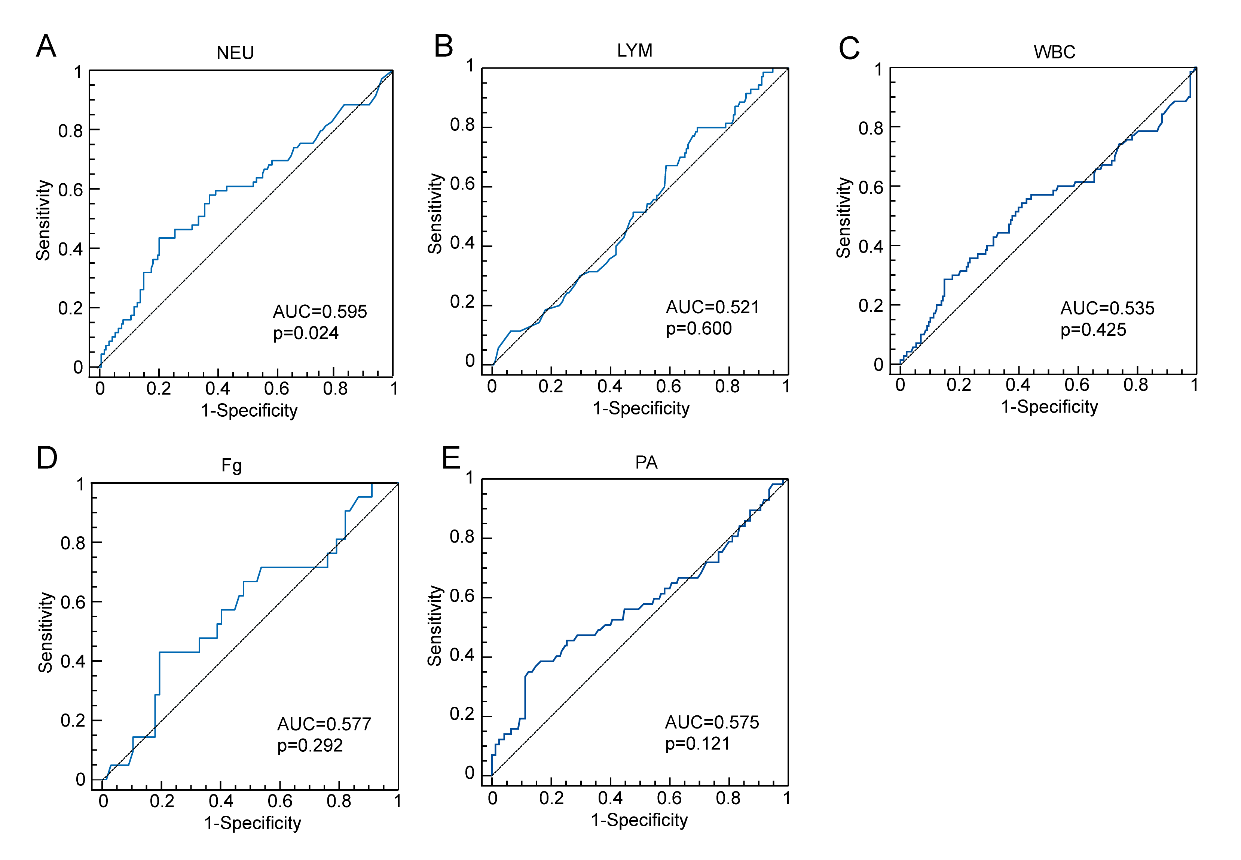


Supplemental material, Figure 2. Diagnostic utility of inflammatory markers for BSI in pediatric tumor patients. (A) ROC curves analyzed that the AUC of NEU prediction was 0.595. (B) ROC curves analyzed that the AUC of LYM prediction was 0.521. (C) ROC curves analyzed that the AUC of WBC prediction was 0.535. (D) ROC curves analyzed that the AUC of Fg prediction was 0.577. (E) ROC curves analyzed that the AUC of PA prediction was 0.575.


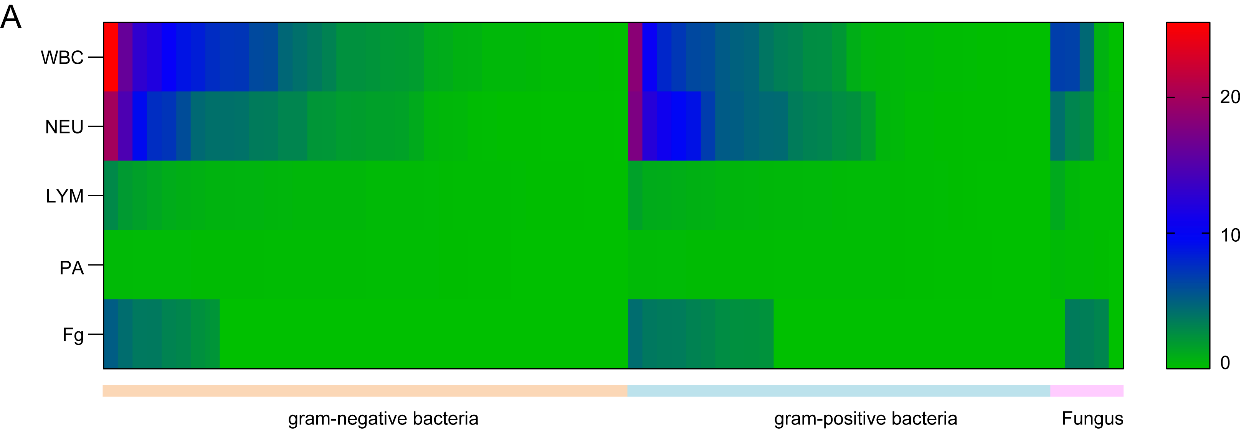


Supplemental material, Figure 3. Heat Map was used to show the variation of WBC, NEU, LYM, PA and Fg in gram-negative bacteria, gram-positive bacteria and Fungus in pediatric tumor patients.

**Supplemental material, Table 1:** The diagnostic performance comparison of NEU, LYM, WBC, PA and Fg in pediatric cancer patients.

| **Diagnostic performance** | **NEU** | **LYM** | **WBC** | **PA** | **Fg** |
| --- | --- | --- | --- | --- | --- |
| AUC | 0.595 | 0.521 | 0.535 | 0.575 | 0.577 |
| 95% CI | 0.533-0.656 | 0.458-0.583 | 0.472-0.597 | 0.508-0.640 | 0.467-0.682 |
| Cut-off value | 3.03×109/L | 1.45×109/L | 5.75×109/L | 0.125g/L | 3.52g/L |
| Sensitivity | 43.48% | 80% | 28.57% | 35.09% | 42.86% |
| Specificity | 79.89% | 30.69% | 85.11% | 87.65% | 80.6% |
| PPV | 42.25% | 18.19% | 40.82% | 25.25% | 14.75% |
| NPV | 78.72% | 72.15% | 76.19% | 33.33% | 57.14% |
| Youden index | 0.2337 | 0.1069 | 0.1386 | 0.2273 | 0.2345 |
| p value | 0.0238 | 0.6001 | 0.4251 | 0.1212 | 0.2923 |

AUC, area under the ROC curve; CI, confidence interval; PPV, positive predictive value; NPV, negative predictive value.

**Supplemental material, Table 2:** Changes of inflammatory biomarkers in pediatric cancer patients infected with gram-negative bacteria, gram-positive bacteria and Fungus.

| Variable | gram-negative bacteria | gram-positive bacteria | Fungus |
| --- | --- | --- | --- |
| WBC median, 109/L | 2.4 (0.05-25.52) | 2.11 (0.03-18.37) | 4.54 (0.05-6.67) |
| NEU median, 109/L | 1.78 (0-19.9) | 2.64 (0.01-17.57) | 2.61 (0.12-4.16) |
| LYM median, 109/L | 0.43 (0.02-2.85) | 0.28 (0.03-1.61) | 0.15 (0.13-1.14) |
| PA median, g/L | 0.19 (0.81-0.28) | 0.14 (0.195-0.31) | 0.17 (0.11-0.27) |
| Fg median, g/L | 3.66 (2.21-5.15) | 3.21 (2.37-4.32) | 3.39 (3.07-3.56) |
